# Supplementary material for: Two interventions to treat pain disorders and post-traumatic symptoms among Syrian refugees: protocol for a randomized controlled trial
Source: Springer Nature journal article supplement (doi:10.1186/s13063-019-3919-x), 2019-12-01
Supplement: MOESM2 [file 17642298]

Date:

Place:

# Effect of physiotherapy and psychological group treatment on physical and mental health among refugees from Syria with pain disorders or post-traumatic symptoms

## QUESTIONNAIRE Q1

### Thank you for taking part in this study!

The information in this questionnaire will be used in research aimed to understand the effect of treatment in your health situation and to improve health care services for refugees. It is important that you answer all the questions. Please ask if there is something you do not understand. The completed questionnaire should be given back to the person who invited you to the study before you leave.

Please answer by putting an X in the box () , or answering the open fields () as explained in the text.

*By answering this questionnaire you accept that we use this information only for the purpose explained to you. All information will be treated in strict confidence.*

Yours sincerely,  
University of Bergen and Health Care services at the Municipality of Bergen.

### FOR THE FIELD WORKER:

**Has the participant already answered another questionnaire for this project (make sure that he/she knows which project you are talking about)?**  
**Has the person already participated in the Syria-health study?**

No     Yes, in Bergen     Yes, in Kristiansand     Yes, in Lebanon     Yes, elsewhere

### HEALTH LITERACY SCREENING

**1 How often do you need to have someone help you when you read instructions, pamphlets, or other written material from your doctor or pharmacy?**

Never     Rarely     Sometimes     Often     Always

### PART 1 – BACKGROUND INFORMATION

**2 Name:**

*Please specify.*

**3 Mobile phone number:**

*Please specify (e.g. 123 45 678).*

**4 Date of birth:**  .  .  (e.g. 01.06.1978)

**5 What is your status in Norway now?**

Asylum seeker     Refugee     Other

## PART 2 – WELL-BEING

**6 Please indicate for each of the five statements which is closest to how you have been feeling over the last two weeks. Notice that higher numbers mean better well-being.**

*Example: If you have felt cheerful and in good spirits more than half of the time during the last two weeks, put a tick in the box with the number 3 in the upper right corner.*

|                                                                | All of the time |   |   |   | At no time |   |
|----------------------------------------------------------------|-----------------|---|---|---|------------|---|
| 6.1 I have felt cheerful and in good spirits                   | 5               | 4 | 3 | 2 | 1          | 0 |
| 6.2 I have felt calm and relaxed                               | 5               | 4 | 3 | 2 | 1          | 0 |
| 6.3 I have felt active and vigorous                            | 5               | 4 | 3 | 2 | 1          | 0 |
| 6.4 I woke up feeling fresh and rested                         | 5               | 4 | 3 | 2 | 1          | 0 |
| 6.5 My daily life has been filled with things that interest me | 5               | 4 | 3 | 2 | 1          | 0 |

**7 Here is a series of questions relating to various aspects of your life. Each question has seven possible answers. Please mark the number, which expresses your answer, with number 1 and 7 being the extreme answers. If the words under 1 are right for you, circle 1: if the words under 7 are right for you, circle 7. If you feel differently, circle the number which best expresses your feeling. Please give only one answer to each question.**

|                                                                                       | Very seldom or never |   |   | Very often |   |   |   |
|---------------------------------------------------------------------------------------|----------------------|---|---|------------|---|---|---|
| 7.1 Do you have the feeling that you don't really care about what goes on around you? | 1                    | 2 | 3 | 4          | 5 | 6 | 7 |

|                                                                                                                    | Never happened |   |   | Always happened |   |   |   |
|--------------------------------------------------------------------------------------------------------------------|----------------|---|---|-----------------|---|---|---|
| 7.2 Has it happened in the past that you were surprised by the behaviour of people whom you thought you knew well? | 1              | 2 | 3 | 4               | 5 | 6 | 7 |

|                                                                       | Never happened |   |   | Always happened |   |   |   |
|-----------------------------------------------------------------------|----------------|---|---|-----------------|---|---|---|
| 7.3 Has it happened that people whom you counted on disappointed you? | 1              | 2 | 3 | 4               | 5 | 6 | 7 |

|                                  | No clear goals or purpose at all |   |   | Very clear goals and purpose |   |   |   |
|----------------------------------|----------------------------------|---|---|------------------------------|---|---|---|
| 7.4 Until now your life has had: | 1                                | 2 | 3 | 4                            | 5 | 6 | 7 |

|                                                                 | Very often |   |   | Very seldom or never |   |   |   |
|-----------------------------------------------------------------|------------|---|---|----------------------|---|---|---|
| 7.5 Do you have the feeling that you're being treated unfairly? | 1          | 2 | 3 | 4                    | 5 | 6 | 7 |

|                                                                                                | Very often |   |   | Very seldom or never |   |   |   |
|------------------------------------------------------------------------------------------------|------------|---|---|----------------------|---|---|---|
| 7.6 Do you have the feeling that you are in an unfamiliar situation and don't know what to do? | 1          | 2 | 3 | 4                    | 5 | 6 | 7 |

|                                          | A source of deep pleasure and satisfaction |   |   | A source of pain and boredom |   |   |   |
|------------------------------------------|--------------------------------------------|---|---|------------------------------|---|---|---|
| 7.7 Doing the thing you do every day is: | 1                                          | 2 | 3 | 4                            | 5 | 6 | 7 |

|                                                   | Very often |   |   | Very seldom or never |   |   |   |
|---------------------------------------------------|------------|---|---|----------------------|---|---|---|
| 7.8 Do you have very mixed-up feelings and ideas? | 1          | 2 | 3 | 4                    | 5 | 6 | 7 |

|                                                                             | Very often |   |   | Very seldom or never |   |   |   |
|-----------------------------------------------------------------------------|------------|---|---|----------------------|---|---|---|
| 7.9 Does it happen that you have feelings inside you would rather not feel? | 1          | 2 | 3 | 4                    | 5 | 6 | 7 |

|                                                                                                                                                                            | Never                                              |   |   |   | Very often                             |   |   |
|----------------------------------------------------------------------------------------------------------------------------------------------------------------------------|----------------------------------------------------|---|---|---|----------------------------------------|---|---|
|                                                                                                                                                                            | 1                                                  | 2 | 3 | 4 | 5                                      | 6 | 7 |
| <b>7.10</b> Many people – even those with a strong character – sometimes feel like sad sacks (losers) in certain situations. How often have you felt this way in the past? |                                                    |   |   |   |                                        |   |   |
|                                                                                                                                                                            | You overestimated or underestimated its importance |   |   |   | You saw things in the right proportion |   |   |
| <b>7.11</b> When something happened, have you generally found that:                                                                                                        | 1                                                  | 2 | 3 | 4 | 5                                      | 6 | 7 |
|                                                                                                                                                                            | Very often                                         |   |   |   | Very seldom or never                   |   |   |
| <b>7.12</b> How often do you have the feeling that there's little meaning in the things you do in your daily life?                                                         | 1                                                  | 2 | 3 | 4 | 5                                      | 6 | 7 |
|                                                                                                                                                                            | Very often                                         |   |   |   | Very seldom                            |   |   |
| <b>7.13</b> How often do you have feelings that you're not sure you can keep under control?                                                                                | 1                                                  | 2 | 3 | 4 | 5                                      | 6 | 7 |

## PART 3 – HEALTH STATUS AND HEALTH HABITS

### 8 How do you consider your health at the moment?

Very poor      Poor      Neither      Good      Very good

                      

### 9 Have you used any of the following medicines?

*(Please place only one X for each medication at the answer that best fits your situation.)*

|                                                           | Daily                    | Weekly                   | Less than weekly         | Never used               |
|-----------------------------------------------------------|--------------------------|--------------------------|--------------------------|--------------------------|
| 9.1 Painkillers, off prescription                         | <input type="checkbox"/> | <input type="checkbox"/> | <input type="checkbox"/> | <input type="checkbox"/> |
| 9.2 Painkillers, on prescription                          | <input type="checkbox"/> | <input type="checkbox"/> | <input type="checkbox"/> | <input type="checkbox"/> |
| 9.3 Sedatives                                             | <input type="checkbox"/> | <input type="checkbox"/> | <input type="checkbox"/> | <input type="checkbox"/> |
| 9.4 Tranquillizers                                        | <input type="checkbox"/> | <input type="checkbox"/> | <input type="checkbox"/> | <input type="checkbox"/> |
| 9.5 Anti-depressive medication                            | <input type="checkbox"/> | <input type="checkbox"/> | <input type="checkbox"/> | <input type="checkbox"/> |
| 9.6 Other prescribed medication, but do not know for what | <input type="checkbox"/> | <input type="checkbox"/> | <input type="checkbox"/> | <input type="checkbox"/> |

### 10 How often do you exercise?

*(On average. Put an X in only one box)*

Never       2-3 times a week

Less than once a week       Nearly every day

Once a week

### 11 About how many hours do you sit during a normal day?

*(Both work hours and leisure time)*

About  hours (e.g. 6 hours)

Yes      No

**12** Do you have physical pain now that has lasted more than 6 months?           

### 13 If yes, how strong has your physical pain been during the last 4 weeks?

No pain      Very mild      Mild      Moderate      Strong      Very strong

                            

## BRIEF PAIN INVENTORY (SHORT FORM)

Yes      No

**14** Throughout our lives, most of us have had pain from time to time (such as minor headaches, sprains, and toothaches). Have you had pain other than these everyday kinds of pain today?           

### 15 On the diagram, shade in the areas where you feel pain. Put an X on the area that hurts the most.

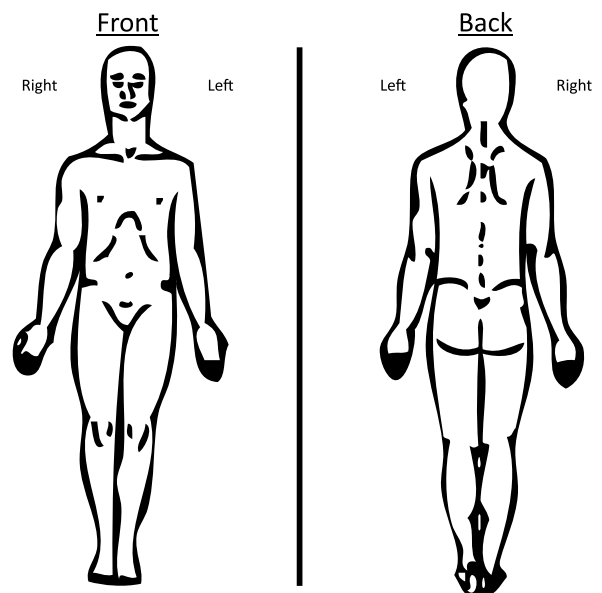

**16** Please rate your pain by marking the box beside the number that best describes your pain at its worst in the last 24 hours.

|         |   |   |   |   |                                |   |   |   |    |
|---------|---|---|---|---|--------------------------------|---|---|---|----|
| No pain |   |   |   |   | Pain as bad as you can imagine |   |   |   |    |
| 1       | 2 | 3 | 4 | 5 | 6                              | 7 | 8 | 9 | 10 |

**17** Please rate your pain by marking the box beside the number that best describes your pain at its least in the last 24 hours.

|         |   |   |   |   |                                |   |   |   |    |
|---------|---|---|---|---|--------------------------------|---|---|---|----|
| No pain |   |   |   |   | Pain as bad as you can imagine |   |   |   |    |
| 1       | 2 | 3 | 4 | 5 | 6                              | 7 | 8 | 9 | 10 |

**18** Please rate your pain by marking the box beside the number that best describes your pain on the average.

|         |   |   |   |   |                                |   |   |   |    |
|---------|---|---|---|---|--------------------------------|---|---|---|----|
| No pain |   |   |   |   | Pain as bad as you can imagine |   |   |   |    |
| 1       | 2 | 3 | 4 | 5 | 6                              | 7 | 8 | 9 | 10 |

**19** Please rate your pain by marking the box beside the number that tells how much pain you have right now.

|         |   |   |   |   |                                |   |   |   |    |
|---------|---|---|---|---|--------------------------------|---|---|---|----|
| No pain |   |   |   |   | Pain as bad as you can imagine |   |   |   |    |
| 1       | 2 | 3 | 4 | 5 | 6                              | 7 | 8 | 9 | 10 |

**20** What treatments or medications are you receiving for your pain?

---



---



---

*Please specify.*

**21** In the last 24 hours, how much relief have pain treatments or medications provided? Please mark the box below the percentage that most shows how much relief you have received.

|           |     |     |     |     |     |     |                 |     |      |
|-----------|-----|-----|-----|-----|-----|-----|-----------------|-----|------|
| No relief |     |     |     |     |     |     | Complete relief |     |      |
| 10%       | 20% | 30% | 40% | 50% | 60% | 70% | 80%             | 90% | 100% |

**22** Mark the box beside the number that describes how, during the past 24 hours, pain has interfered with your:

**22.1 General activity**

|                    |   |   |   |   |                       |   |   |   |    |
|--------------------|---|---|---|---|-----------------------|---|---|---|----|
| Does not interfere |   |   |   |   | Completely interferes |   |   |   |    |
| 1                  | 2 | 3 | 4 | 5 | 6                     | 7 | 8 | 9 | 10 |

**22.2 Mood**

|                    |   |   |   |   |                       |   |   |   |    |
|--------------------|---|---|---|---|-----------------------|---|---|---|----|
| Does not interfere |   |   |   |   | Completely interferes |   |   |   |    |
| 1                  | 2 | 3 | 4 | 5 | 6                     | 7 | 8 | 9 | 10 |

**22.3 Walking ability**

|                    |   |   |   |   |                       |   |   |   |    |
|--------------------|---|---|---|---|-----------------------|---|---|---|----|
| Does not interfere |   |   |   |   | Completely interferes |   |   |   |    |
| 1                  | 2 | 3 | 4 | 5 | 6                     | 7 | 8 | 9 | 10 |

**22.4 Normal work**

*(includes both work outside the home and housework)*

|                    |   |   |   |   |                       |   |   |   |    |
|--------------------|---|---|---|---|-----------------------|---|---|---|----|
| Does not interfere |   |   |   |   | Completely interferes |   |   |   |    |
| 1                  | 2 | 3 | 4 | 5 | 6                     | 7 | 8 | 9 | 10 |

**22.5 Relations with other people**

|                    |   |   |   |   |                       |   |   |   |    |
|--------------------|---|---|---|---|-----------------------|---|---|---|----|
| Does not interfere |   |   |   |   | Completely interferes |   |   |   |    |
| 1                  | 2 | 3 | 4 | 5 | 6                     | 7 | 8 | 9 | 10 |

**22.6 Sleep**

|                    |   |   |   |   |                       |   |   |   |    |
|--------------------|---|---|---|---|-----------------------|---|---|---|----|
| Does not interfere |   |   |   |   | Completely interferes |   |   |   |    |
| 1                  | 2 | 3 | 4 | 5 | 6                     | 7 | 8 | 9 | 10 |

**22.7 Enjoyment of life**

|                    |   |   |   |   |                       |   |   |   |    |
|--------------------|---|---|---|---|-----------------------|---|---|---|----|
| Does not interfere |   |   |   |   | Completely interferes |   |   |   |    |
| 1                  | 2 | 3 | 4 | 5 | 6                     | 7 | 8 | 9 | 10 |

**23** Exposure to a stressful event or situation (either short or long lasting) of exceptionally threatening or catastrophic nature is likely to cause pervasive distress in almost anyone. Examples of such difficult and frightening experiences are: being assaulted, or witnessing other people being hurt or killed.

Yes      No

Have you experienced any of these or some other terrifying event(s)?

## IMPACT OF EVENTS SCALE - REVISED (IES-R)

**INSTRUCTIONS:** Below is a list of difficulties people sometimes have after stressful life events. Please read each item, and then indicate how distressing each difficulty has been for you **during the past seven days** with respect to \_\_\_\_\_ (event) that occurred on \_\_\_\_\_ (date). How much have you been distressed or bothered by these difficulties?

|                                                                                                                               | Not at all | A little bit | Moderately | Quite a bit | Extremely |
|-------------------------------------------------------------------------------------------------------------------------------|------------|--------------|------------|-------------|-----------|
| 24.1 Any reminder brought back feelings about it.                                                                             | 0          | 1            | 2          | 3           | 4         |
| 24.2 I had trouble staying asleep.                                                                                            | 0          | 1            | 2          | 3           | 4         |
| 24.3 Other things kept making me think about it.                                                                              | 0          | 1            | 2          | 3           | 4         |
| 24.4 I felt irritable and angry.                                                                                              | 0          | 1            | 2          | 3           | 4         |
| 24.5 I avoided letting myself get upset when I thought about it or was reminded of it.                                        | 0          | 1            | 2          | 3           | 4         |
| 24.6 I thought about it when I didn't mean to.                                                                                | 0          | 1            | 2          | 3           | 4         |
| 24.7 I felt as if it hadn't happened or wasn't real.                                                                          | 0          | 1            | 2          | 3           | 4         |
| 24.8 I stayed away from reminders of it.                                                                                      | 0          | 1            | 2          | 3           | 4         |
| 24.9 Pictures about it popped into my mind.                                                                                   | 0          | 1            | 2          | 3           | 4         |
| 24.10 I was jumpy and easily startled.                                                                                        | 0          | 1            | 2          | 3           | 4         |
| 24.11 I tried not to think about it.                                                                                          | 0          | 1            | 2          | 3           | 4         |
| 24.12 I was aware that I still had a lot of feelings about it but I didn't deal with them.                                    | 0          | 1            | 2          | 3           | 4         |
| 24.13 My feelings about it were kind of numb.                                                                                 | 0          | 1            | 2          | 3           | 4         |
| 24.14 I found myself acting or feeling like I was back at that time.                                                          | 0          | 1            | 2          | 3           | 4         |
| 24.15 I had trouble falling asleep.                                                                                           | 0          | 1            | 2          | 3           | 4         |
| 24.16 I had waves of strong feelings about it.                                                                                | 0          | 1            | 2          | 3           | 4         |
| 24.17 I tried to remove it from my memory.                                                                                    | 0          | 1            | 2          | 3           | 4         |
| 24.18 I had trouble concentrating.                                                                                            | 0          | 1            | 2          | 3           | 4         |
| 24.19 Reminders of it caused me to have physical reactions, such as sweating, trouble breathing, nausea, or a pounding heart. | 0          | 1            | 2          | 3           | 4         |
| 24.20 I had dreams about it.                                                                                                  | 0          | 1            | 2          | 3           | 4         |
| 24.21 I felt watchful and on-guard.                                                                                           | 0          | 1            | 2          | 3           | 4         |
| 24.22 I tried not to talk about it.                                                                                           | 0          | 1            | 2          | 3           | 4         |

**25 We would like to know how you have been feeling the last couple of months. Please mark the option that best suits your situation.**

During the last two weeks, have you:

|                                                                |                   |                     |                 |                               |
|----------------------------------------------------------------|-------------------|---------------------|-----------------|-------------------------------|
| 25.1 Been able to concentrate on what you're doing?            | Better than usual | As usual            | Less than usual | A lot less than usual         |
| 25.2 Lost much sleep over worry?                               | Has not happened  | Not more than usual | More than usual | I slept a lot less than usual |
| 25.3 Felt that you are playing a useful part in things?        | More than usual   | As usual            | Less than usual | A lot less than usual         |
| 25.4 Felt capable of making decisions about things?            | More than usual   | As usual            | Less than usual | A lot less than usual         |
| 25.5 Felt constantly under strain?                             | Not at all        | Not more than usual | More than usual | A lot more than usual         |
| 25.6 Felt you couldn't overcome your difficulties?             | Not at all        | Not more than usual | More than usual | A lot more than usual         |
| 25.7 Been able to enjoy your normal day to day activities?     | More than usual   | As usual            | Less than usual | A lot less than usual         |
| 25.8 Been able to face up to your problems?                    | Better than usual | As usual            | Less than usual | A lot less than usual         |
| 25.9 Been feeling unhappy or depressed?                        | Not at all        | Not more than usual | More than usual | A lot more than usual         |
| 25.10 Been losing confidence in yourself?                      | Not at all        | Not more than usual | More than usual | A lot more than usual         |
| 25.11 Been thinking of yourself as a worthless person?         | Not at all        | Not more than usual | More than usual | A lot more than usual         |
| 25.12 Been feeling reasonably happy for day-to-day activities? | More than usual   | As usual            | Less than usual | A lot less than usual         |

**THANK YOU FOR ANSWERING THESE QUESTIONS! PLEASE MAKE SURE TO RETURN THIS FORM TO THE PERSON WHO GAVE IT TO YOU BEFORE LEAVING.**
